# Supplementary material for: The Cost of Virulence: Retarded Growth of Salmonella Typhimurium Cells Expressing Type III Secretion System 1
Source: PubMed Central journal article supplement (PMC3145796; doi:10.1371/journal.ppat.1002143), 2011-07-28

Figure S3

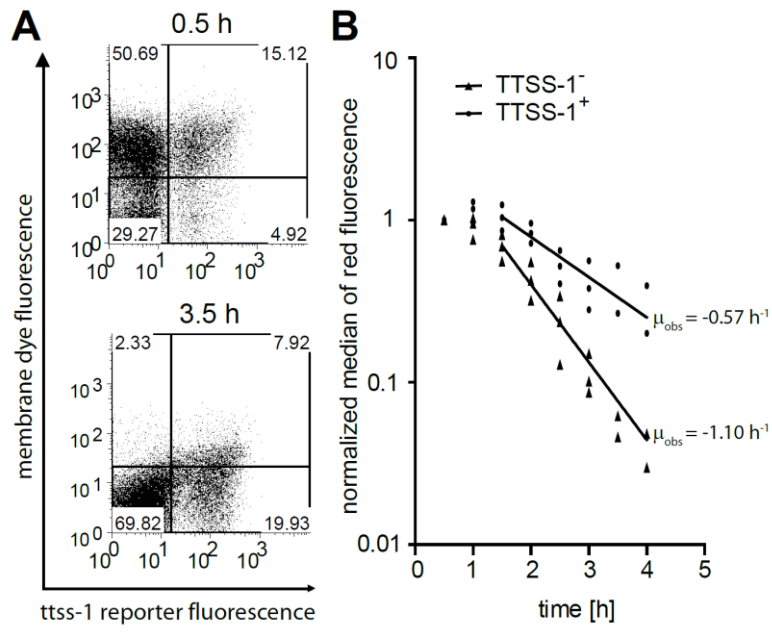

Supplement: ppat.1002143.s003.pdf [file ppat.1002143.s003.pdf]
