# Supplementary material for: The Cost of Virulence: Retarded Growth of Salmonella Typhimurium Cells Expressing Type III Secretion System 1
Source: PubMed Central journal article supplement (PMC3145796; doi:10.1371/journal.ppat.1002143), 2011-07-28
Supplement: ppat.1002143.s006.pdf [file ppat.1002143.s006.pdf]

**Table S1. Bacterial strains**

| Strain    | relevant genotype                                                                                                                                                                         | reference                                      |
|-----------|-------------------------------------------------------------------------------------------------------------------------------------------------------------------------------------------|------------------------------------------------|
| ATCC14028 | wt <i>S. Typhimurium</i> ( <i>S. Tm</i> )                                                                                                                                                 | American Type Culture Collection               |
| JH3010    | SL1344, <i>prgH-gfp</i> reporter; wt                                                                                                                                                      | [1]                                            |
| SKI12     | SL1344, <i>wbaP::cat</i>                                                                                                                                                                  | [2]                                            |
| M2001     | ATCC 14028, <i>sipA-ts<sub>r</sub>venus</i> reporter; wt                                                                                                                                  | [5]                                            |
| M2005     | ATCC 14028, <i>hilA::aphT</i>                                                                                                                                                             | This study                                     |
| M2007     | ATCC 14028, <i>hilD::aphT</i>                                                                                                                                                             | This study                                     |
| M2008     | ATCC 14028, <i>hilE::cat</i>                                                                                                                                                              | This study                                     |
| M2018     | ATCC 14028, <i>sipA-ts<sub>r</sub>venus</i> , <i>hilA::aphT</i>                                                                                                                           | This study                                     |
| M2072     | SL1344, <i>prgHIJKorgABC::aphT</i> ,<br><i>invGEABCIJspaOPQRS::cat</i>                                                                                                                    | This study                                     |
| M2076     | ATCC 14028, <i>hilA-ts<sub>r</sub>venus</i>                                                                                                                                               | This study                                     |
| M2400     | $\Delta$ <i>sopE</i> , $\Delta$ <i>sopE2</i> , $\Delta$ <i>sopB</i> , $\Delta$ <i>sipA</i> , $\Delta$ <i>sptP</i> , $\Delta$ <i>sopA</i> ,<br>$\Delta$ <i>spvB</i> , $\Delta$ <i>spvC</i> | [6]                                            |
| M2532     | $\Delta$ <i>sipBCDA-sptP::aphT</i> , $\Delta$ <i>sopE</i> , $\Delta$ <i>sopE2</i> , $\Delta$ <i>sopB</i><br>$\Delta$ <i>sopA</i> , $\Delta$ <i>spvB</i> , $\Delta$ <i>spvC</i>            | This study                                     |
| M2821     | SL1344, <i>fliC-ts<sub>r</sub>venus</i>                                                                                                                                                   | This study                                     |
| M556      | SL1344, <i>sseD::aphT</i>                                                                                                                                                                 | [7]                                            |
| RM69      | $\Delta$ <i>spi-1</i>                                                                                                                                                                     | [8]                                            |
| SL1344    | wt <i>S. Typhimurium</i> ( <i>S. Tm</i> )                                                                                                                                                 | [9]                                            |
| SB245     | $\Delta$ <i>sipABCD sptP::aphT fliGHI::Tn10</i>                                                                                                                                           | K. Kaniga and J. E. Galan,<br>unpublished data |

Deletion of *hilA* was performed by insertion of a kanamycin resistance cassette as previously described [10]. M2001, a wt ATCC14028 derivative carrying the *sipA-ts<sub>r</sub>venus* reporter [11] in the chromosome downstream of the *sipA* stop codon has been described, recently [5]. M2018 was constructed by P22 transduction of the *hilA::aphT* allele into M2001. *tss-1* regulators were amplified by PCR from SL1344 genomic DNA, cloned into pBAD24 and expressed under control of the p<sub>BAD</sub> promoter.
