# Supplementary material for: The Cost of Virulence: Retarded Growth of Salmonella Typhimurium Cells Expressing Type III Secretion System 1
Source: PubMed Central journal article supplement (PMC3145796; doi:10.1371/journal.ppat.1002143), 2011-07-28
Supplement: ppat.1002143.s007.pdf [file ppat.1002143.s007.pdf]

**Table S2. Plasmids**

| <b>Plasmid</b>       | <b>feature of interest</b>                                                                                                                                              | <b>reference</b> |
|----------------------|-------------------------------------------------------------------------------------------------------------------------------------------------------------------------|------------------|
| <i>philA</i>         | Amp <sup>r</sup> , pBAD-Myc/HisC with <i>hilA-myc/his</i> ORF under <i>ara</i> control; pCH112                                                                          | [12]             |
| <i>philC</i>         | Amp <sup>r</sup> , pBAD-Myc/HisC with <i>hilC-myc/his</i> ORF under <i>ara</i> control; pLS119                                                                          | [13]             |
| <i>philD</i>         | Amp <sup>r</sup> , pBAD-Myc/HisC with <i>hilD-myc/his</i> ORF under <i>ara</i> control; pLS118                                                                          | [13]             |
| pM1300               | Tet <sup>r</sup> , pSB377 <i>sipA</i> (nt 1156-2058 of the orf)                                                                                                         | [14]             |
| pM2010               | Amp <sup>r</sup> , pBAD24 with <i>hile</i> ORF under <i>ara</i> control                                                                                                 | this study       |
| pM2011               | Amp <sup>r</sup> , pBAD24 with <i>sirA</i> ORF under <i>ara</i> control                                                                                                 | this study       |
| pM2015               | Amp <sup>r</sup> , pBAD24 with <i>rtsA</i> ORF under <i>ara</i> control                                                                                                 | this study       |
| pM2017               | Amp <sup>r</sup> , pBAD24 with <i>ompR</i> ORF under <i>ara</i> control                                                                                                 | this study       |
| pM2018               | Amp <sup>r</sup> , pBAD24 with <i>csrA</i> ORF under <i>ara</i> control                                                                                                 | this study       |
| pM2021               | Amp <sup>r</sup> , pBAD24 with <i>csrB</i> ORF under <i>ara</i> control                                                                                                 | this study       |
| pM2024               | Amp <sup>r</sup> , pBAD24 with <i>hha</i> ORF under <i>ara</i> control                                                                                                  | this study       |
| pM2025               | Amp <sup>r</sup> , pBAD24 with <i>fur</i> ORF under <i>ara</i> control                                                                                                  | this study       |
| pM2026               | Amp <sup>r</sup> , pBAD24 with <i>fis</i> ORF under <i>ara</i> control                                                                                                  | this study       |
| pM2028               | Amp <sup>r</sup> , pBAD24 with <i>hns</i> ORF under <i>ara</i> control                                                                                                  | this study       |
| pM2039               | Amp <sup>r</sup> , pBAD24 with <i>crp</i> ORF under <i>ara</i> control                                                                                                  | this study       |
| pM2042               | Amp <sup>r</sup> , pBAD24 with <i>cpxA</i> ORF under <i>ara</i> control                                                                                                 | this study       |
| <i>psicA gfp</i>     | Amp <sup>r</sup> , pBR322ori with <i>promoter of sicA</i> was inserted into pM968, thus driving <i>gfp</i> expression from the <i>sicA</i> promoter                     | This study, [15] |
| <i>psicA mCherry</i> | Amp <sup>r</sup> , Cm <sup>r</sup> , <i>gfp</i> of <i>psicA gfp</i> has been replaced by <i>mCherry</i> and Cm <sup>r</sup> was introduced                              | This study       |
| pM2002               | Tet <sup>r</sup> , pSB377 with <i>tsr<sub>venus</sub></i> downstream of <i>sipA</i> (nt 1156-2058 of the orf) for homologous recombination into <i>S. Tm</i> chromosome | This study       |
| pM2080               | Tet <sup>r</sup> , pSB377 with <i>tsr<sub>venus</sub></i> downstream of <i>hilA</i> (nt 114 to 1661 of the orf) for homologous recombination into <i>S. Tm</i>          | This study       |

|        |                                                                                                                                                            |            |
|--------|------------------------------------------------------------------------------------------------------------------------------------------------------------|------------|
| pM2090 | Amp <sup>r</sup> , pBluescriptII (Invitrogen), c-terminal region of <i>hila</i>                                                                            | This study |
| pM2095 | Amp <sup>r</sup> , pBluescriptII (Invitrogen), c-terminal region of <i>hila</i> transcriptionally fused to <i>tsr<sub>venus</sub></i>                      | This study |
| pM2533 | Amp <sup>r</sup> , pBluescriptII (Invitrogen), <i>tsr<sub>venus</sub></i>                                                                                  | This study |
| pM2539 | Amp <sup>r</sup> , pM2533 with <i>fliC</i> upstream of <i>tsr<sub>venus</sub></i>                                                                          | This study |
| pM2819 | Amp <sup>r</sup> , pGP704 with <i>tsr<sub>venus</sub></i> downstream of <i>fliC</i> (nt 25-1485 of the orf) for homologous recombination into <i>S. Tm</i> | This study |

---
