# Supplementary material for: The Cost of Virulence: Retarded Growth of Salmonella Typhimurium Cells Expressing Type III Secretion System 1
Source: PubMed Central journal article supplement (PMC3145796; doi:10.1371/journal.ppat.1002143), 2011-07-28
Supplement: ppat.1002143.s009.pdf [file ppat.1002143.s009.pdf]

**Text S1. Mathematical model for calculating the rate of initiation  $r_i$  of *ttss-I* gene expression during the late log phase.**

To infer the initiation rate ( $r_i$ ) of *ttss-I* expression in the late logarithmic phase from our experimental data, we developed a mathematical model describing the growth of the TTSS-1<sup>+</sup> ( $N_{T1+}$ : number of TTSS-1<sup>+</sup> cells;  $\mu_{T1+}$ : growth rate of these cells) and the TTSS-1<sup>-</sup> population ( $N_{T1-}$ : number of TTSS-1<sup>-</sup> cells;  $\mu_{T1-}$ : growth rate of these cells) as a function of time ( $t$ ). *ttss-I* expression is initiated in the TTSS-1<sup>-</sup> subpopulation at the rate  $r_i$ :

$$\frac{dN_{T1+}}{dt} = \mu_{T1+} N_{T1+}(t) + r_i(t) N_{T1-}(t) \quad (1)$$

$$\frac{dN_{T1-}}{dt} = \mu_{T1-} N_{T1-}(t) - r_i(t) N_{T1-}(t) \quad (2)$$

During the late logarithmic phase, the relative abundance of the TTSS-1<sup>+</sup> individuals increased, and the fraction  $\alpha$  of TTSS-1<sup>-</sup> individuals ( $N_{T1+}$ ) decreased dynamically (Fig. 3A):

$$\alpha(t) = \frac{N_{T1-}(t)}{N_{T1-}(t) + N_{T1+}(t)} \quad (3a)$$

At any time, the total number of individuals  $N_{total}(t)$  consists of the two subpopulations  $N_{T1-}(t)$  and  $N_{T1+}(t)$ :

$$N_{total}(t) = N_{T1-}(t) + N_{T1+}(t) \quad (3b)$$

From our experiments, we know the parameters  $\mu_{T1-}$  and  $\mu_{T1+}$  (Fig. 2),  $\alpha(t)$  and  $N_{total}(t) = OD_{600}(t)$  (Fig. 3A). Now, we can use these data to estimate  $r_i(t)$ .

Combining Eq. (3a) and Eq. (3b) yields an expression, with which we can calculate the dynamic progression of the TTSS-1<sup>-</sup> subpopulation:

$$N_{T1-}(t) = \alpha(t) \cdot N_{total}(t) \quad (3c)$$

As  $\alpha(t)$  and  $N_{total}(t)$  were measured in the experiment shown in Fig. 3A, we can take Eq. (3c) to calculate  $N_{T1-}(t)$ . To calculate  $r_i(t)$  we have rearranged Eq. (2):

$$r_i(t) = \frac{\mu_{T1-} N_{T1-}(t) - \frac{dN_{T1-}}{dt}}{N_{T1-}(t)} \quad (4)$$

To obtain  $r_i(t)$ , we fitted an empirical function to the data for  $N_{T1-}(t)$  yielding  $N_{T1-}(t) = 1.76E-02 t(h)^{2.53}$  and differentiated this function vs ( $t$ ) to obtain  $dN_{T1-}/dt$ :

$$\frac{dN_{T1-}}{dt} = 2.53 \cdot 1.76 \cdot 10^{-2} \cdot t(h)^{(2.53-1)}$$

Using these values and Eq. (4) allowed us to calculate  $r_i(t)$  during the late logarithmic phase (Fig. 3B).
