# Supplementary material for: The Cost of Virulence: Retarded Growth of Salmonella Typhimurium Cells Expressing Type III Secretion System 1
Source: PLoS Pathog. 2011 Jul 28;7(7):e1002143. doi: 10.1371/journal.ppat.1002143 (PMC3145796; doi:10.1371/journal.ppat.1002143)
Supplement: Table S3 — Primer sequences. (PDF) [file ppat.1002143.s008.pdf]

**Table S3. Primer sequences**

| <b>Primer</b>          | <b>Sequence 5'-3'</b>                                         |
|------------------------|---------------------------------------------------------------|
| SirA-EcoRI-fw          | GTGAATTCTTGATCAACGTTCTTCTTG                                   |
| SirA-XbaI-rev          | GTTCTAGATCACTGGCTTGTTAACGTCTC                                 |
| RtsA-EcoRI-fw          | TCGAATTCATGCTAAAAGTATTTAATCCCTC                               |
| RtsA-XbaI-rev          | GATCTAGATCAATTAACATATTGATGACGAG                               |
| OmpR-EcoRI-fw          | GCGAATTCATGCAAGAGAATTATAAGATTCTGGTGG                          |
| OmpR-XbaI-rev          | GCTCTAGATCATGCTTTAGAACCGTCCG                                  |
| CsrA-EcoRI-fw          | GCGAATTCATGCTGATTCTGACTCGTCGAG                                |
| CsrA-XbaI-rev          | GCTCTAGATTAGTAACTGGACTGCTGGG                                  |
| Fur-EcoRI-fw           | GTGAATTCATGACTGACAACAATACCGC                                  |
| Fur-XbaI-rev           | GTTCTAGATTATTTAGTCGCGTCATCGTG                                 |
| Fis-EcoRI-fw           | GAGAATTCATGAAAGCGGAATGTGAACC                                  |
| Fis-XbaI-rev           | GATCTAGATTACTTCTCTGAAGATAGCGCG                                |
| Hha-EcoRI-fw           | GCGAATTCATGTCTGATAAACCATTAACTAAAC                             |
| Hha-XbaI-rev           | GATCTAGATTAAACGAATGAATTTCCATACTGAAG                           |
| Hns-EcoRI-fw           | GCGAATTCATGAGCGAAGCACTTAAAATTCTG                              |
| Hns-XbaI-rev           | GATCTAGATTATTCCTTGATCAGGAAATCTTCCAG                           |
| CsrB-NheI-fw           | GAGCTAGCGAGTCGTACAACGAAGCGAACGTC                              |
| CsrB-HindIII-rev       | GGAAGCTTCAAAAAAAGGGAGCACTGTATAAACAG                           |
| Crp-EcoRI-fw           | GCGAATTCATGGTGCTTGCGCAAACCGCAAACAG                            |
| Crp-XbaI-rev           | GCTCTAGAGTGATAAATCAGTCTTCGCCACATCG                            |
| Mlc-EcoRI-fw           | GAGAATTCGTGGTTGCTGATAGTCAGCCTGGG                              |
| Mlc-XbaI-rev           | GATCTAGAGGCAAGGGCAATCAGCTTGAGTTAGC                            |
| CpxA-EcoRI-fw          | GCGAATTCATGATAGGAAGTTTAACCGCGCGCATC                           |
| CpxA-XbaI-rev          | GATCTAGATTAGGTTGCTGTACAGCGGTAGCCACAGC                         |
| $\Delta$ hilA::kan-fw  | TATTATAACTTTTCACCCTGTAAGAGAATACACTATTATCGTGTAGGCTGGAGCTGCTTC  |
| $\Delta$ hilA::kan-rev | ACGATGATAAAAAAATAATGCATATCTCCTCTCTCAGATTATGGGAATTAGCCATGGTCC  |
| $\Delta$ hilD::kan-fw  | CCAGTAAGGAACATTAAAATAACATCAACAAAGGGATAATGTGTAGGCTGGAGCTGCTTC  |
| $\Delta$ hilD::kan-rev | TTAATAAAAAATCTTTACTTAAGTGACAGATACAAAAATGATGGGAATTAGCCATGGTCC  |
| $\Delta$ hilE::cat-fw  | ATTGTCGGTATTTAATCTGGTATACAGAGACACCAACGAAGTGATAGGCTGGAGCTGCTTC |
| $\Delta$ hilE::cat-rev | ACAGCATCGCCCACTGCGAGTCCGCAAGCTTGTTTTGTCCATGGGAATTAGCCATGGTCC  |
| invG-fw                | GCGGAAATTATCAAATATTATTCAATTGGCAGACAAATGATGTAGGCTGGAGCTGCTTC   |
| spaS-rev               | AAAAACGCCCAATGAATACATCGCTACTGCCTTACGCGGCCATATGAATATCCTCCTTA   |
| prgH-fw                | CTGCTGCTATCGAGAACGACAGACATCGCTAACAGTATATTGTAGGCTGGAGCTGCTTC   |
| orgC-rev               | TATACACCATACCTTATCACAAATCGCCAGCAATGGGGGTCATATGAATATCCTCCTTA   |
| hilA-fw-XmaI-NcoI      | GCCCCGGGCCATGGAAGAATATGCCGTTCTGGTC                            |
| hilA-rev-NheI-XbaI     | GCGCTAGCTCTAGATTTTACCGTAATTTAATCAAGCGGGG                      |
| venus -NheI-fw         | GCGCTAGCAAGAAGGAGCCCTTCAC                                     |
| venus-NotI-rev         | ATGCGGCCGCGCGCTCTGAAGTTCC                                     |
| tsr-XmaI-fw            | GAGCCCGGGTTAAGAAGGAGCCCTTCAC                                  |
| venus-XbaI-rev         | GATCTAGACTAGAGAATAGGAACCTTCAACTGC                             |
| fliC-XhoI-fw           | GACTCGAGGAGCTCCAGCCTGTCGCTGTTGACCCAGAATAAC                    |

**fliC-HindIII-rev**

GAAAGCTTTTAACGCAGTAAAGAGAGGAC

---
